# Supplementary material for: Chemokine Receptor 5 Antagonism Causes Reduction in Joint Inflammation in a Collagen-Induced Arthritis Mouse Model
Source: PubMed Central journal article supplement (PMC8036613; doi:10.3390/molecules26071839), 2021-03-25
Supplement: molecules-26-01839-s001.pdf [file molecules-26-01839-s001.pdf]

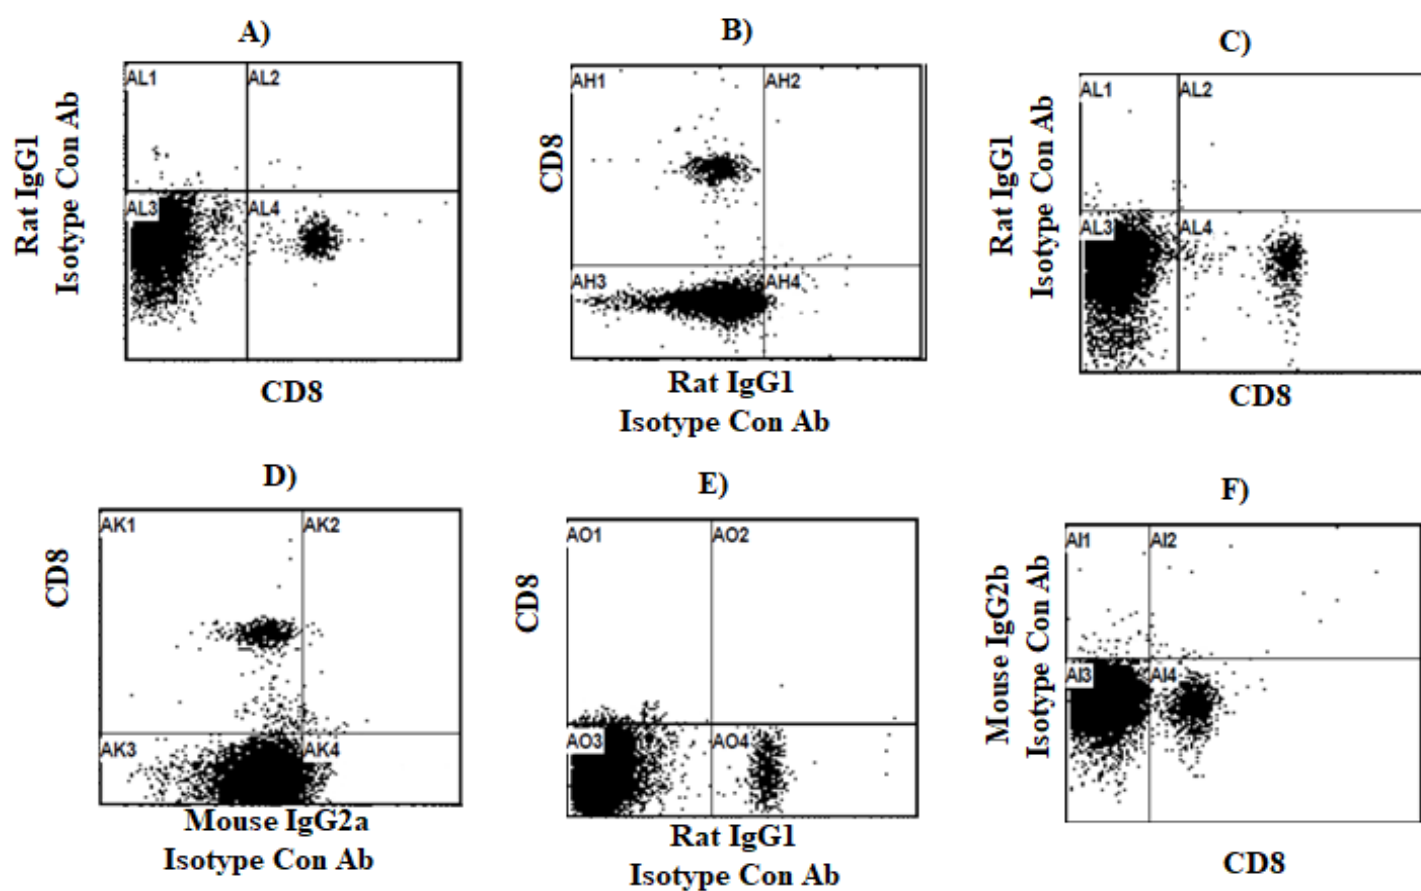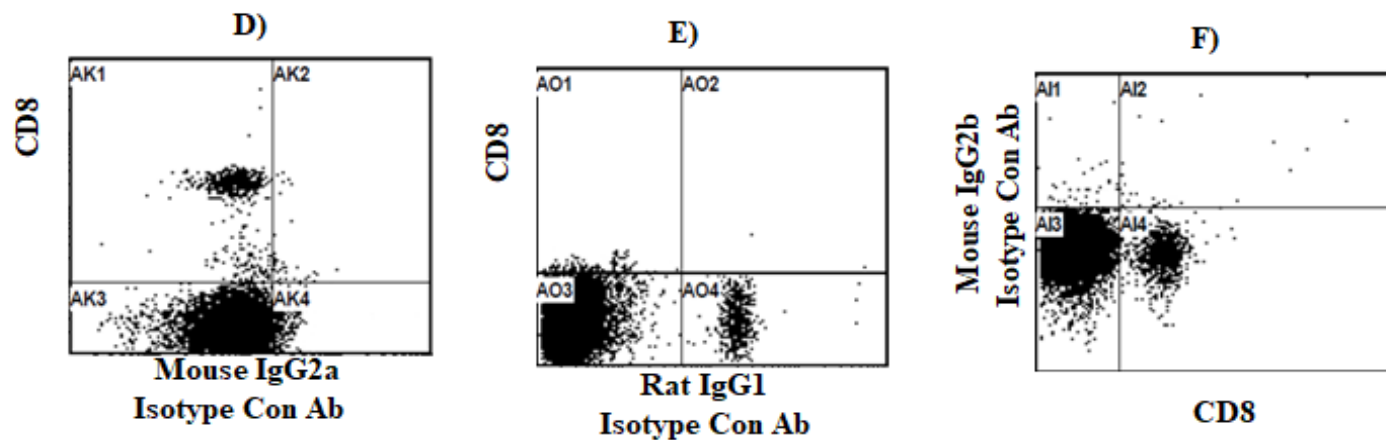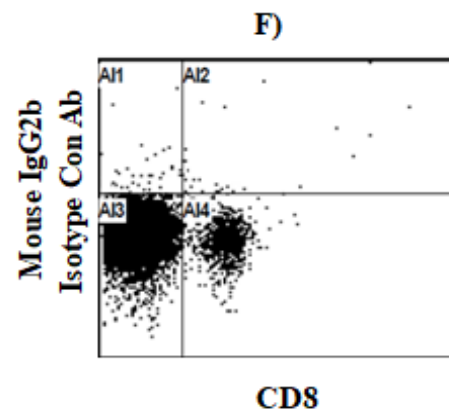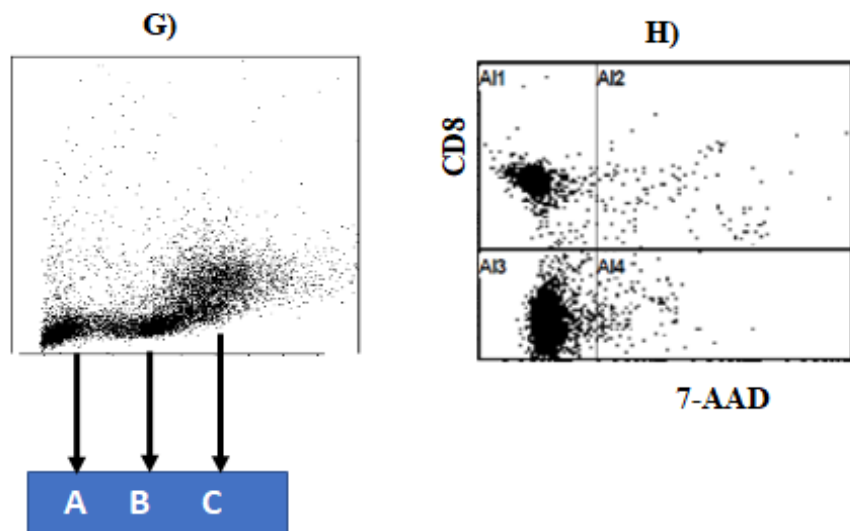

### Suppl Fig. 1

**A)** Isotype control for Fig. 2D.

**B)** Isotype control for Fig. 3E.

**C)** Isotype control for Fig. 4I.

**D)** Isotype control for Fig. 4G.

**E)** Isotype control for Fig. 5D.

**F)** Isotype control for Fig. 5E.

There was almost negligible immunostaining for the proteins of interest on CD8<sup>+</sup> T cells with isotype control antibodies (i.e. in absence of protein specific antibodies).

### Suppl Fig. 1

**G)** Representative forward and side scatter plot of spleen cells. A, B, and C depict lymphocyte, monocyte and granulocyte gates respectively according to conventional gating strategy. Gate A was further selected for investigation of biomarkers on T cells.

**H)** 7-AAD staining on CD8<sup>+</sup> T cells in A gating. Most of the CD8<sup>+</sup> T cells were viable as there were <5% dead cells in CD8<sup>+</sup> T compartment, i.e. cells showing double positive immunostaining for both 7-AAD and CD8<sup>+</sup> T cells (quadrant AI2).
